# Supplementary material for: Relevance of secretor status genotype and microbiota composition in susceptibility to rotavirus and norovirus infections in humans
Source: PubMed Central journal article supplement (PMC5372083; doi:10.1038/srep45559), 2017-03-30
Supplement: srep45559-s1.pdf [file srep45559-s1.pdf]

**Relevance of secretor status genotype and microbiota composition in susceptibility to rotavirus and norovirus infections in humans**

Jesús Rodríguez-Díaz, Izaskun García-Mantrana, Susana Vila-Vicent, Roberto Gozalbo-Rovira, Javier Buesa, Vicente Monedero and Maria Carmen Collado

**Supplementary material**

## Supplementary material

**Figure S1.** AnovaPlot with the significant OTU relative abundances between Secretor (n=28) and non-secretor (n=7) individuals. Bars represents the mean of the relative abundances with the standard error. The asterisk indicates the presence of significant differences ( $p < 0.05$ ).

**Figure S2.** AnovaPlot with the significant OTU relative abundances between FUT2<sup>+/+</sup> (n=9), FUT2<sup>+/-</sup> (n=19) and FUT2<sup>-/-</sup> (n=7). The asterisk indicates the presence of significant differences ( $p < 0.05$ ).

**Figure S3.** Rarefaction curves based on Chao1 and Shannon indexes in secretor and non-secretor (Panel A and B) and also, in the FUT2 genotypes (Panel C and D). Rarefaction curves are calculated for each sample based on the OTU computations at 97% of homology.

**Figure S4.** Determination of the differences in the global community (ANOSIM test) (panel A) and bacterial diversity and richness between women and men participating in the study (panel B).

OTU (p<0.05, anova)

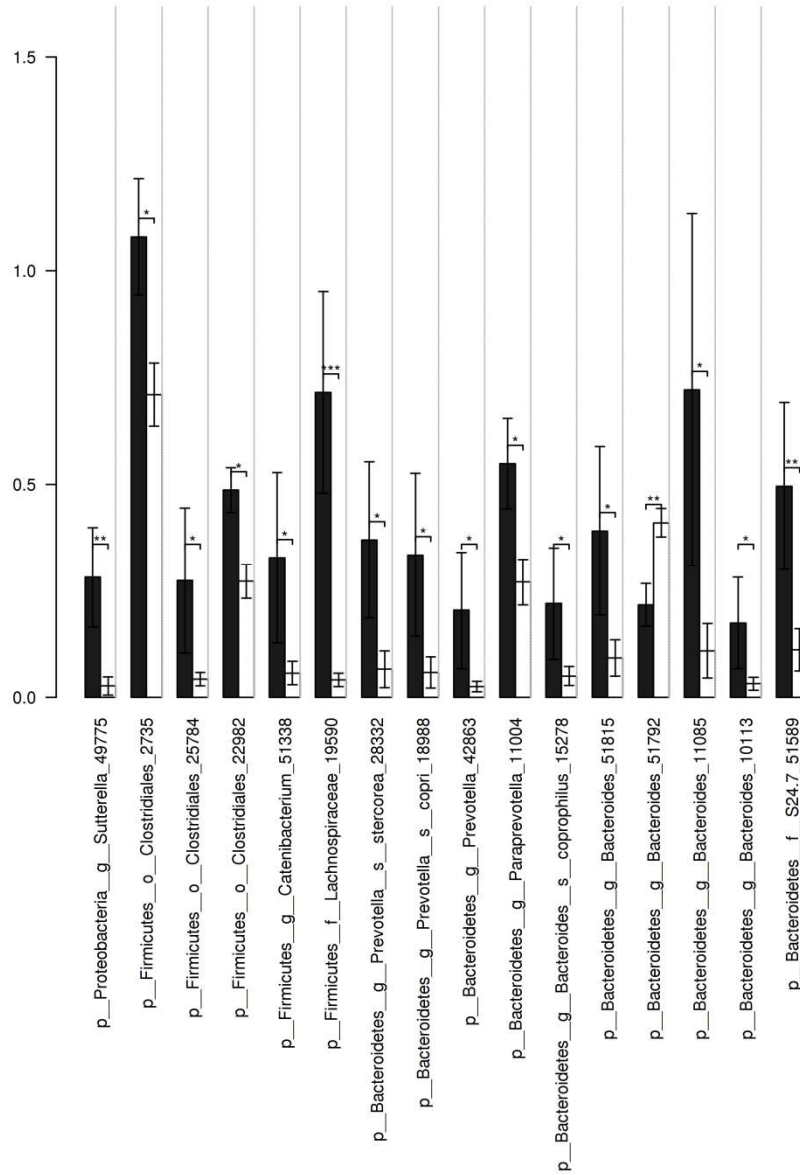

□ Secretors  
 ■ Non-secretors

| Taxa                                                 | P        |
|------------------------------------------------------|----------|
| p__Firmicutes_f__Lachnospiraceae_19590               | 0.000007 |
| p__Proteobacteria_g__Sutterella_49775                | 0.001400 |
| p__Bacteroidetes_g__Bacteroides_51792                | 0.007100 |
| p__Bacteroidetes_f__S24.7_51589                      | 0.008700 |
| p__Firmicutes_o__Clostridiales_22982                 | 0.011000 |
| p__Bacteroidetes_g__Bacteroides_11085                | 0.018000 |
| p__Firmicutes_o__Clostridiales_25784                 | 0.019000 |
| p__Bacteroidetes_g__Prevotella_s__stercora_28332     | 0.021000 |
| p__Bacteroidetes_g__Paraprevotella_11004             | 0.021000 |
| p__Firmicutes_o__Clostridiales_2735                  | 0.023000 |
| p__Bacteroidetes_g__Prevotella_42863                 | 0.024000 |
| p__Firmicutes_g__Catenibacterium_51338               | 0.026000 |
| p__Bacteroidetes_g__Prevotella_s__copri_18988        | 0.029000 |
| p__Bacteroidetes_g__Bacteroides_51815                | 0.029000 |
| p__Bacteroidetes_g__Bacteroides_10113                | 0.031000 |
| p__Bacteroidetes_g__Bacteroides_s__coprophilus_15278 | 0.041000 |
| p__Bacteroidetes_f__S24.7_40924                      | 0.053000 |
| p__Firmicutes_o__Clostridiales_13842                 | 0.054000 |
| p__Firmicutes_f__Christensenellaceae_5674            | 0.066000 |

Figure S1

OTU (p<0.05, anova)

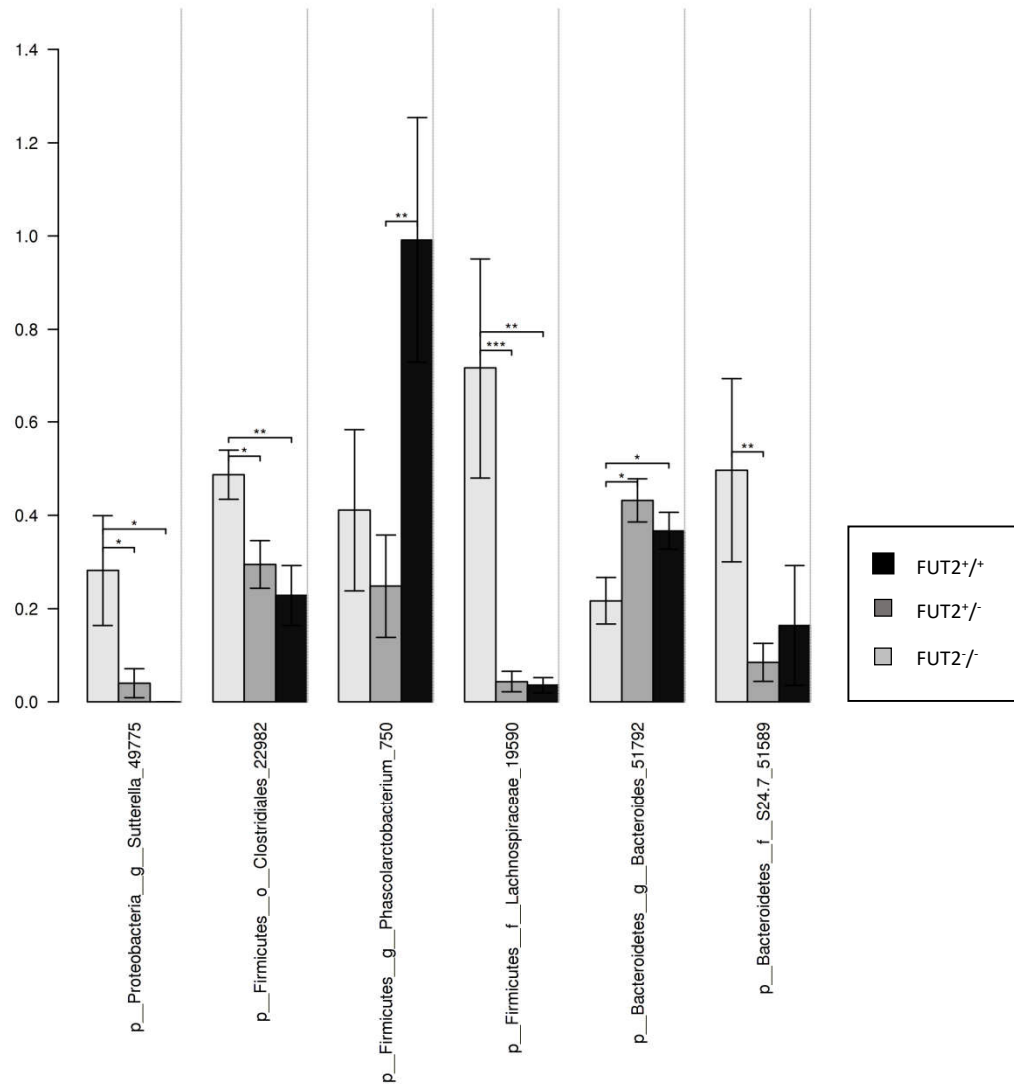

| Taxa                                        | P        |
|---------------------------------------------|----------|
| p__Firmicutes__f__Lachnospiraceae_19590     | 0.000050 |
| p__Proteobacteria__g__Sutterella_49775      | 0.005600 |
| p__Firmicutes__g__Phascolarctobacterium_750 | 0.011000 |
| p__Bacteroidetes__g__Bacteroides_51792      | 0.018000 |
| p__Firmicutes__o__Clostridiales_22982       | 0.029000 |
| p__Bacteroidetes__f__S24.7_51589            | 0.029000 |

Figure S2

**A)**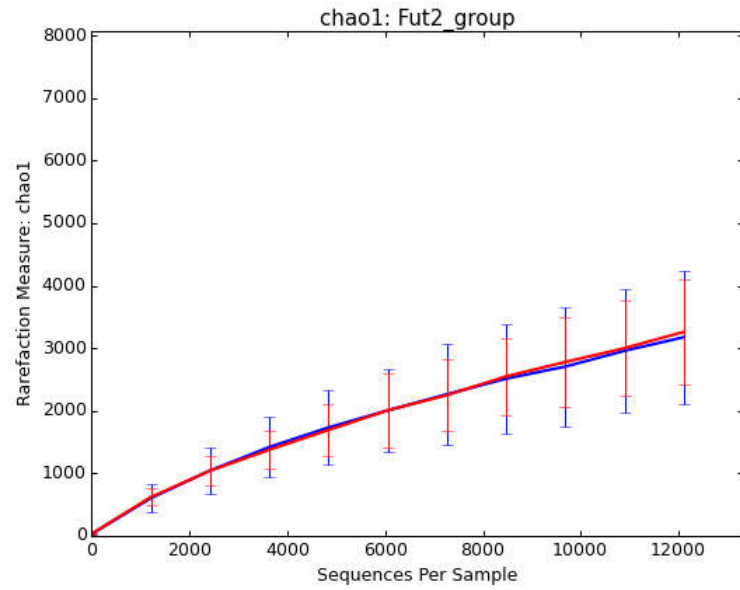**B)**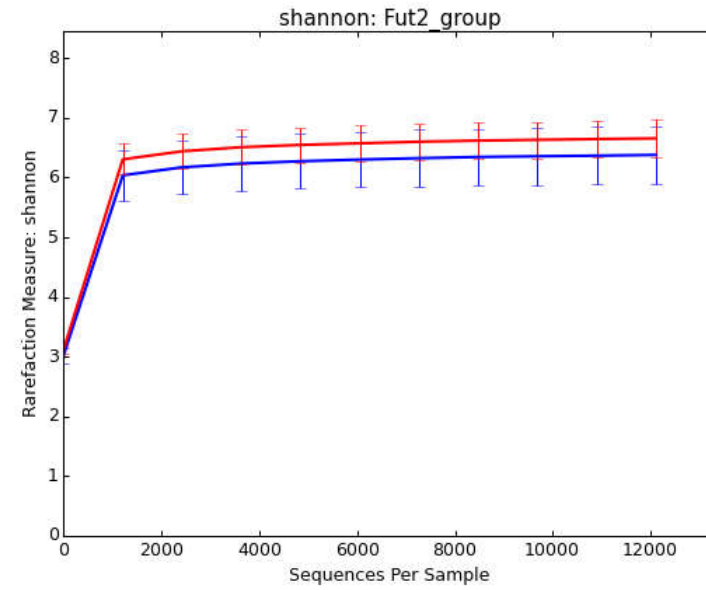**C)**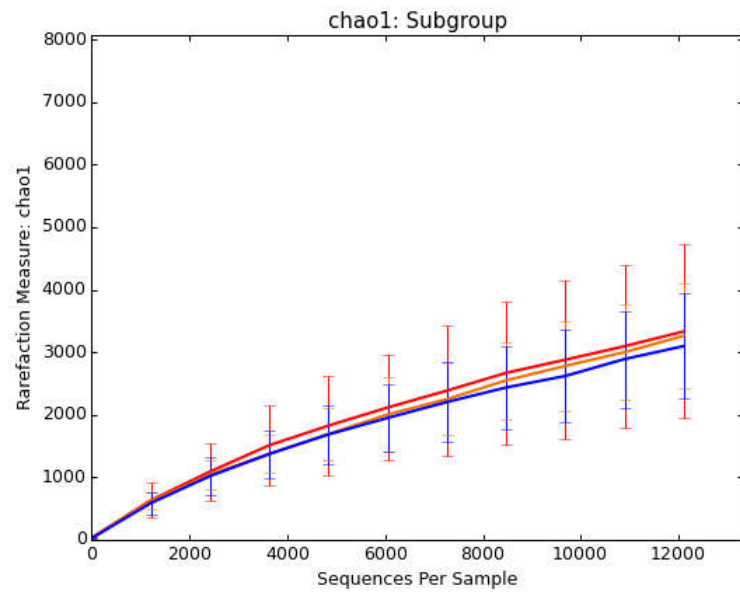**D)**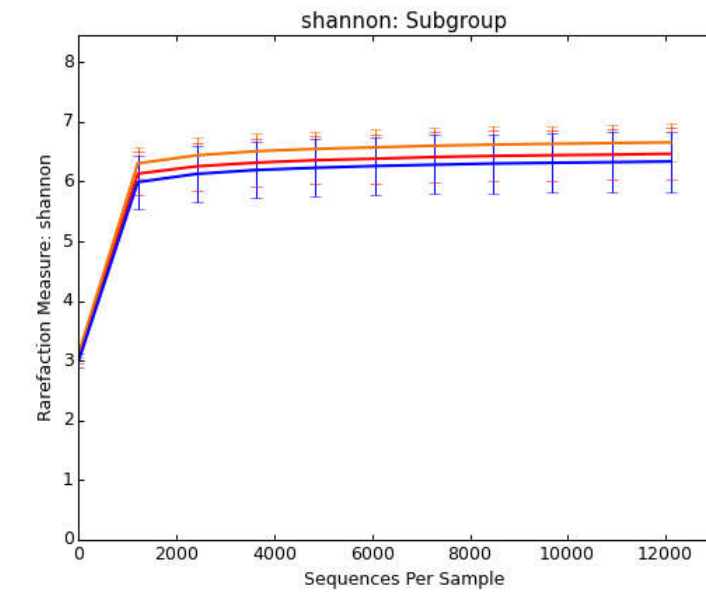**Figure S3**

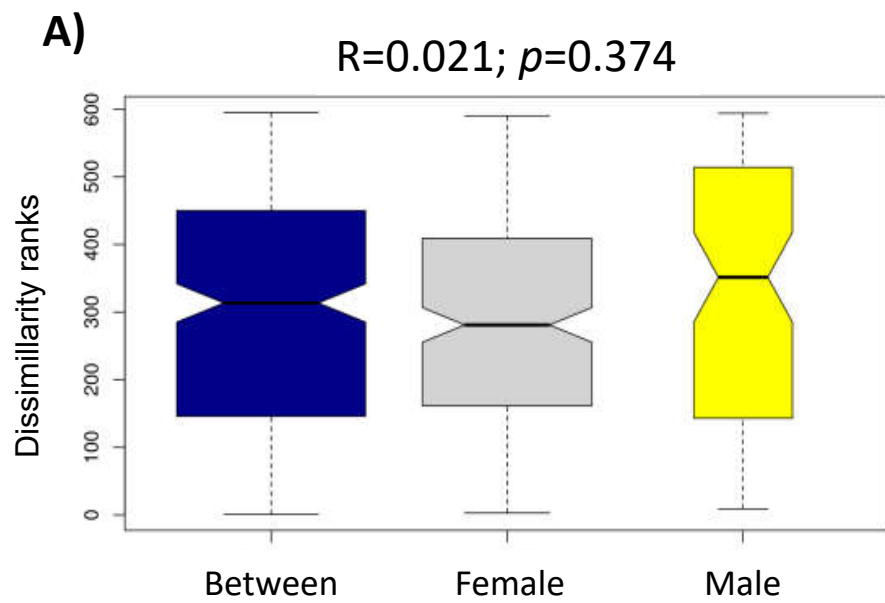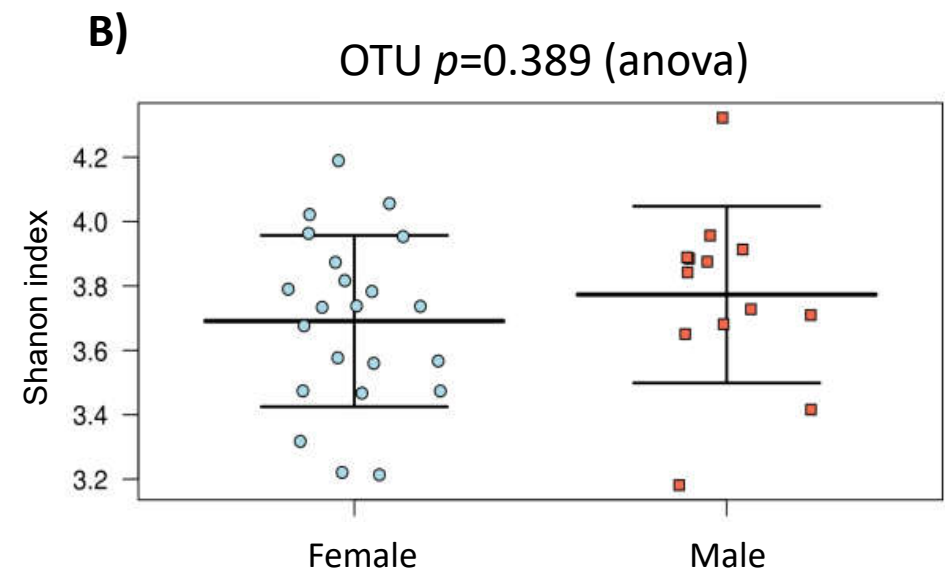

**Figure S4**
